# Supplementary material for: A Novel Anti-inflammatory Role for Spleen-Derived Interleukin-10 in Obesity-Induced Inflammation in White Adipose Tissue and Liver
Source: PubMed Central journal article supplement — Diabetes. 2012 Jul 17;61(8):1994–2003. doi: 10.2337/db11-1688 (PMC3402315; doi:10.2337/db11-1688), 2012-07-17

SUPPLEMENTARY DATA

**Supplementary Table 1.** Splenectomy (SPX) induces catabolic effects.

Daily food intake, body weight, epididymal white adipose tissue (WAT), area under the curve of oxygen consumption (AUC-VO<sub>2</sub>), carbon dioxide production (VCO<sub>2</sub>), respiratory quotient (RQ), serum triglycerides (TGs), free fatty acids (FFAs), total cholesterol (TC), adiponectin, and alanine transaminase (ALT) levels in each group (*n* = 6). \**P* < 0.05 vs. Sham group. Treatment groups: standard-sham, fed a standard chow and given a sham operation; standard-SPX, fed a standard chow and given a splenectomy.

|                                         | Standard-Sham | Standard-SPX   |
|-----------------------------------------|---------------|----------------|
| Daily food intake (cal/g weight)        | 182.8 ± 14.8  | 148.3 ± 10.7 * |
| Body weight (g)                         | 48.4 ± 3.2    | 40.3 ± 2.2 *   |
| Epididymal WAT (g)                      | 13.8 ± 1.16   | 10.8 ± 1.11 *  |
| AUC VO <sub>2</sub> (ml/24 h/g weight)  | 277.3 ± 52.4  | 452.7 ± 40.5 * |
| AUC VCO <sub>2</sub> (ml/24 h/g weight) | 255.3 ± 47.7  | 375.4 ± 42.7 * |
| AUC RQ                                  | 1289 ± 144    | 1007 ± 127 *   |
| Serum ALT level (IU/dl)                 | 29.2 ± 4.5    | 43.4 ± 3.1 *   |
| Serum TG level (mg/dl)                  | 39.3 ± 2.6    | 48.6 ± 3.5 *   |
| Serum FFA level (mEq/l)                 | 178.1 ± 144   | 208.3 ± 10.5 * |
| Serum TC level (mg/dl)                  | 56.2 ± 8.2    | 58.8 ± 13.1    |
| Serum adiponectin level (µg/ml)         | 7.12 ± 0.14   | 6.23 ± 0.13 *  |

SUPPLEMENTARY DATA

**Supplementary Figure 1.** Systemic administration of interleukin (IL)-10 suppresses splenectomy (SPX)-induced catabolic effects.

Daily food intake (A), body weight (B), and area under the curve of oxygen consumption (AUC-VO<sub>2</sub>), carbon dioxide production (VCO<sub>2</sub>), and the respiratory quotient (RQ) (C) in each group (*n* = 6). \**P* < 0.05 vs. Sham-Standard group, #*P* < 0.05 vs. Sham-HF group, \$*P* < 0.05 vs. SPX-HF group. Treatment groups: sham-standard, fed a standard chow, administered serum albumin, and given a sham operation; sham-HF, fed a HF diet, administered serum albumin, and given a sham operation; SPX-HF, fed a HF diet, administered serum albumin, and given a splenectomy; SPX+IL-10-HF, fed a HF diet, administered IL-10, and given a splenectomy; Pair-fed, administered serum albumin, given a sham operation, and fed the amount of food consumed by the SPX-HF group.

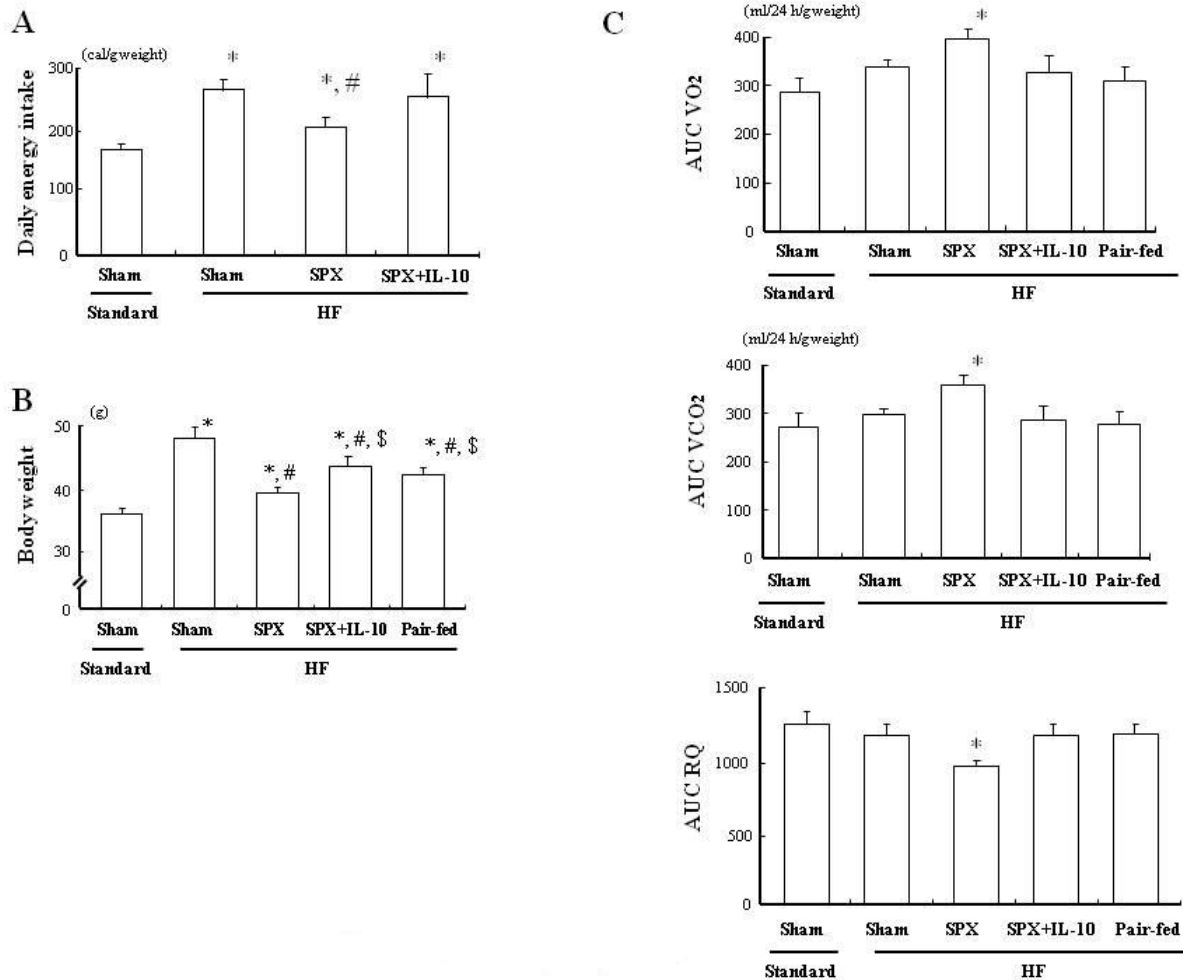

SUPPLEMENTARY DATA

**Supplementary Figure 2.** Splenectomy (SPX) has little effect on glucose metabolism in IL-10-deficient mice.

Blood glucose (top) and plasma insulin (bottom) levels during the glucose tolerance tests in each group of IL-10KO mice ( $n = 6$ ). \* $P < 0.05$  vs. Sham-HF and SPX-HF group. Treatment groups: sham, administered serum albumin and given a sham operation; SPX, administered serum and given a splenectomy; SPX+IL-10, administered recombinant mouse IL-10 and given a splenectomy.

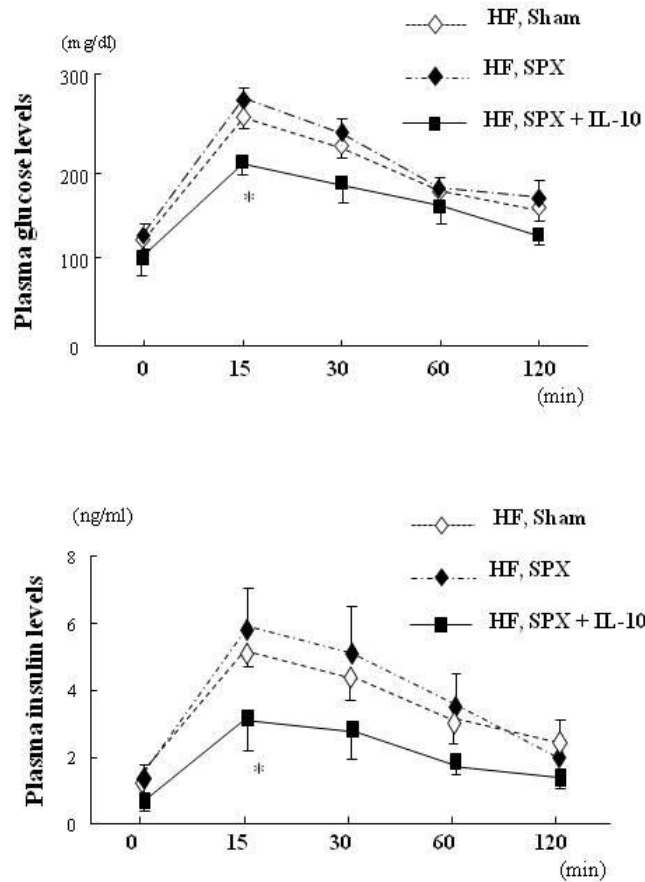

Supplement: supp_db11-1688_DB111688SupplementaryData.pdf [file supp_db11-1688_DB111688SupplementaryData.pdf]
